# Supplementary material for: Rewiring methanol assimilation and reductive glycine pathways in Saccharomyces cerevisiae to increase one-carbon recovery
Source: Royal Society of Chemistry journal article supplement (doi:10.1039/d4gc05254d), 2025-01-01
Supplement: d4gc05254d1.pdf [file d4gc05254d1.pdf]

**Supplementary information**

**Rewiring methanol assimilation and reductive glycine pathways in *Saccharomyces cerevisiae* to increase one-carbon recovery**

Mingming Qi<sup>a</sup>, Chao Zhu<sup>a</sup>, Chi Cheng<sup>a, b \*</sup>, Wei Kang<sup>a, b \*</sup>, Chuang Xue<sup>a, b \*</sup>

<sup>a</sup> MOE Key Laboratory of Bio-Intelligent Manufacturing, State Key Laboratory of Fine Chemicals, Frontiers Science Centre for Smart Materials Oriented Chemical Engineering, School of Bioengineering, Dalian University of Technology, Dalian 116024, China

<sup>b</sup> Ningbo Institute of Dalian University of Technology, Ningbo 315016, China

\* **Corresponding author:** Cheng Chi@dlut.edu.cn, Kang Wei@dlut.edu.cn, Xue.1@dlut.edu.cn.

**Supplementary Methods:**

## **Whole-genome resequencing and data analysis**

The control strain M01 and three evolved strains of M29 were chosen for genome sequencing. The whole genome was sequenced using Illumina HiSeq/Novaseq/MGI2000 at Genewiz Biotech (Suzhou, China). Data analysis was used by fastp (V0.23.0) and annotation for SNV/InDel was performed by Annovar (V21 Apr 2018).

## **<sup>13</sup>C Metabolite tracer analysis**

For <sup>13</sup>C metabolite tracer analysis, strain M45 was cultivated in YPD overnight and washed twice with PBS (pH=7.2) before being transferred to YNB medium with 0.1% yeast extract and 0.4% <sup>13</sup>C-methanol (Sigma-Aldrich), initial OD<sub>600</sub> was around 0.3, then cultured for 144 h. The yeast (about 10<sup>7</sup> cells) was taken, mixed with 1000 μL of extraction solution consisting of methanol, acetonitrile, and water in a ratio of 2:2:1 (v/v). The mixture was vortexed for 30 s and then incubated in liquid nitrogen for 1 min. Subsequently, the samples were allowed to thaw at room temperature and vortexed for 30 s. This freeze-thaw cycle was repeated three times. Following that, the samples were sonicated for 10 min in a 4°C water bath and incubated for 1 h at -40°C to precipitate proteins. The samples were centrifuged at 12000 rpm for 15 min at 4°C. The supernatant was collected and evaporated to dryness by a vacuum concentrator. The dried extracts were then reconstituted in 100 μL of a mixture of acetonitrile and water in a 1:1 ratio (v/v), followed by sonication for 10 min at 50 Hz and 4°C, and centrifugation for 15 min at 16,200 g and 4°C to eliminate insoluble material. The supernatants were transferred to glass vials for subsequent analysis.

For the analysis of polar metabolites, LC-MS/MS was conducted using an UHPLC system (Vanquish, Thermo Fisher Scientific) coupled with a Waters ACQUITY UPLC BEH Amide column (2.1 mm×100 mm, 1.7 μm) and an Orbitrap Exploris 120 mass

spectrometer (Orbitrap MS, Thermo Fisher Scientific). The mobile phase comprised 25 mmol/L of ammonium acetate and 25 mmol/L of ammonia hydroxide in water (pH=9.75) (A) and acetonitrile (B). The auto-sampler temperature was 4°C, and the injection volume was 2 µL. For the analysis of non-polar metabolites, LC-MS/MS was conducted using an UHPLC system (Vanquish, Thermo Fisher Scientific) coupled with a Phenomenex Kinetex C18 column (2.1 mm×100 mm, 2.6 µm) and an Orbitrap Exploris 120 mass spectrometer (Orbitrap MS, Thermo Fisher Scientific). The mobile phase consisted of 0.01% acetic acid in water (A) and a mixture of isopropanol and acetonitrile (1:1, v/v) (B). The auto-sampler temperature was 4°C, and the injection volume was 2 µL. The ESI source conditions were set as follows: sheath gas flow rate at 50 Arb, auxiliary gas flow rate at 15 Arb, capillary temperature at 320°C, full MS resolution at 60,000, MS/MS resolution at 15,000, collision energy set to 20/30/40 eV in NCE mode, and spray voltage at 3.8 kV (positive) or -3.4 kV (negative), respectively.

GC-MS was used for the detection of metabolites in the reductive glycine pathway. Firstly, strain M47 was cultivated in YPD overnight and washed twice with PBS (pH = 7.2) before being transferred to YNB medium with 0.1% yeast extract, 2% methanol, 250 mM sodium formate, 100 mM (NH<sub>4</sub>)<sub>2</sub>SO<sub>4</sub>, and 35 mM NaH<sup>13</sup>CO<sub>3</sub> (Sigma-Aldrich), initial OD<sub>600</sub> was around 0.2, then cultured for 144 h. The metabolites were subsequently derivatized for GC-MS analysis following a previously published protocol <sup>1</sup>. The cells were ground in liquid nitrogen, re-suspended in 1 mL of cold (-40°C) 50% aqueous methanol, and placed in dry ice for 30 min before thawing the samples on ice. Then, 0.4 mL of chloroform was added, and the mixture was vortexed for 30 s, and centrifuged for 15 min at 14,000 rpm (4°C). The supernatant was then transferred to new 1.5 mL tubes for evaporation and storage at -80°C prior to analysis.

Metabolites were derivatized for GC-MS analysis as follows: First, 70  $\mu$ L of O-Isobutylhydroxylamine hydrochloride was added to the dried pellet and incubated for 20 min at 85°C. After cooling, 30  $\mu$ L of *N-tert*-butyldimethylsilyl-*N*-methyltrifluoroacetamide (MTBSTFA) was added and samples were re-incubated for 60 min at 85°C before centrifugation for 15 min at 12,000 rpm (4°C). The supernatant was transferred to an autosampler vial for GC-MS analysis.

A Shimadzu QP-2020 GC-MS was programmed with an injection temperature of 250°C. The GC column used was a 30 m $\times$ 0.25 mm $\times$ 0.25 mm DB-5ms. GC-MS interface temperature was 300°C and ion source temperature was set at 200°C, with 70 V ionization voltage. The mass spectrometer was set to scan *m/z* range 50-700, with 1 kV detector. GC flow rate with helium carrier gas was 0.92 ml/min. The gradient elution of GC oven temperature was list as follows: 120°C for 3 min, followed by a ramp of 4 °C min<sup>-1</sup> to 170°C, 0 min hold; 2°C min<sup>-1</sup> to 182°C, 0 min hold; 20°C min<sup>-1</sup> to 195°C, 0 min hold; 3°C min<sup>-1</sup> to 230°C, 0 min hold; 10°C min<sup>-1</sup> to 265°C, 0 min hold; 3°C min<sup>-1</sup> to 280°C, 5 min hold, and the injection volume was 5  $\mu$ L.

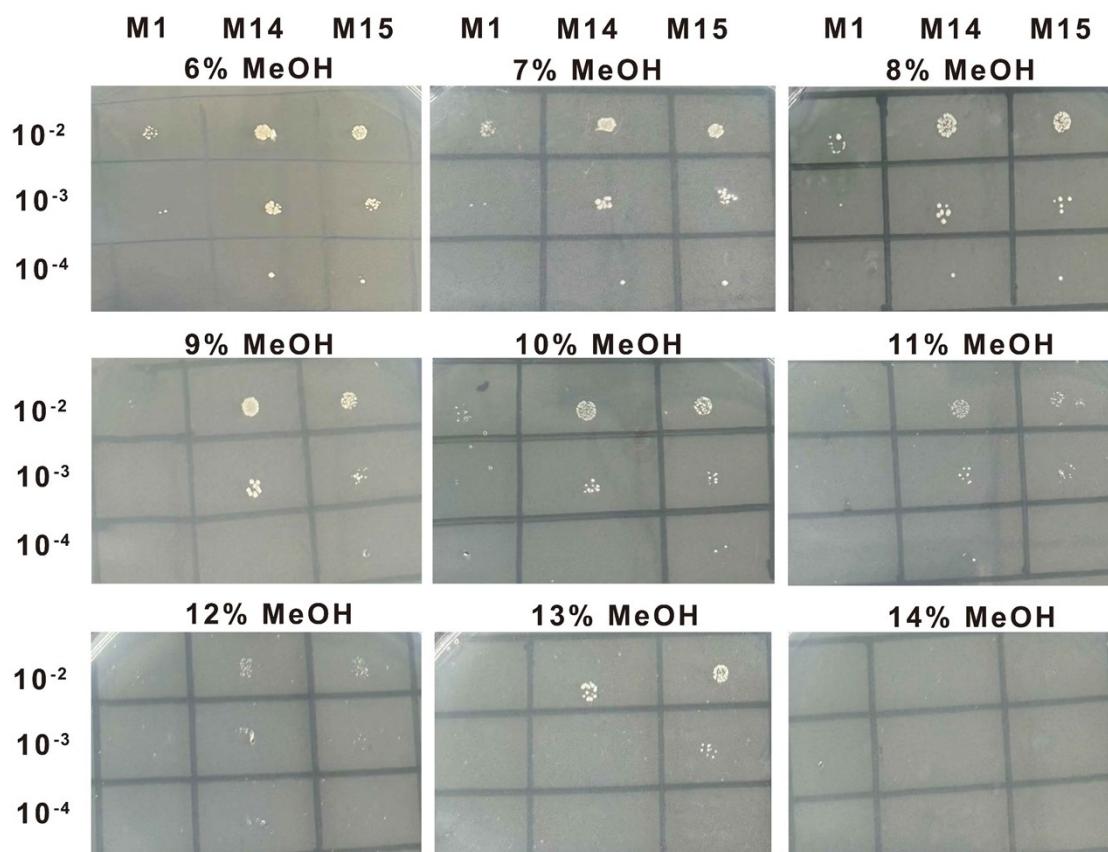

**Supplementary Fig. S1** Growth in different concentrations of methanol to evaluate their tolerance to methanol. Growth on solid YNB medium with 0.1% yeast extract, and different concentrations of methanol, methanol (MeOH). Images were taken after incubating at 30°C for 6 days.

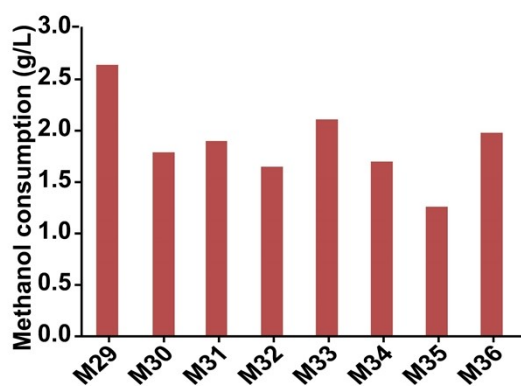

**Supplementary Fig. S2** Fermentation validation of 8 single clones from the evolved strains G2-80 plate. Strains were cultured in YNB medium with 2% methanol, 0.1% yeast extract at 30°C, 220 rpm, and the initial OD<sub>600</sub> was around 0.15.

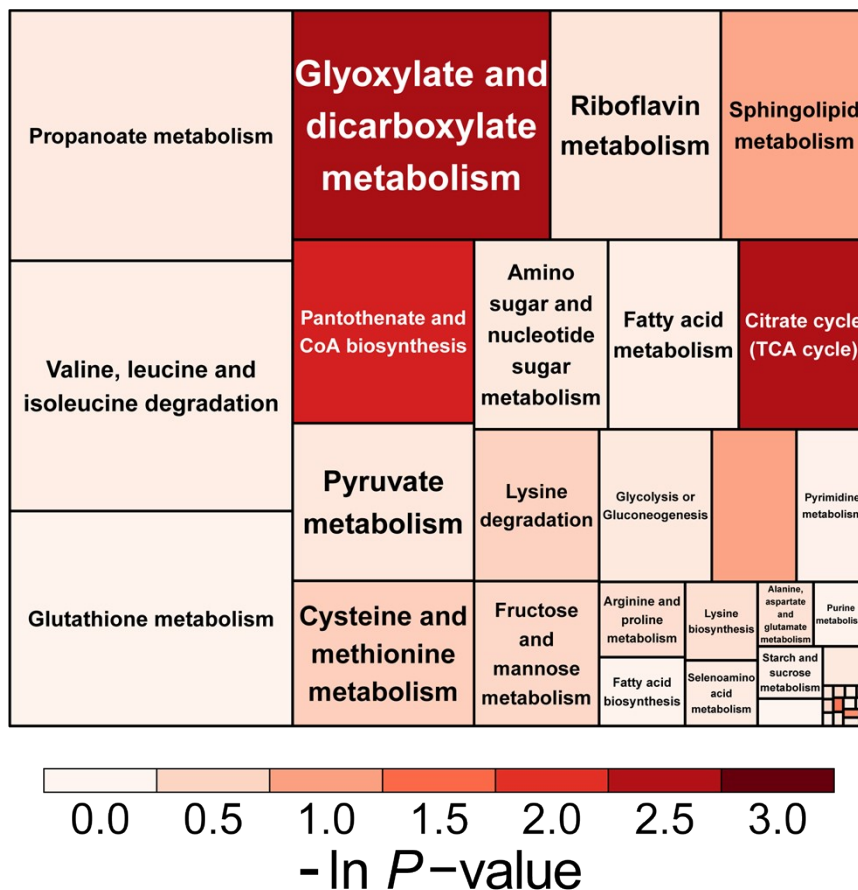

**Supplementary Fig. S3** Pathway analysis of  $^{13}\text{C}$ -labelled metabolites in strain M045. The labelled metabolites are mainly involved in glyoxylate metabolism and TCA cycle, suggesting that we have successfully rewired the central carbon metabolism of *S. cerevisiae* through modularization and ALE strategies, engineering it into a methylotrophic yeast.

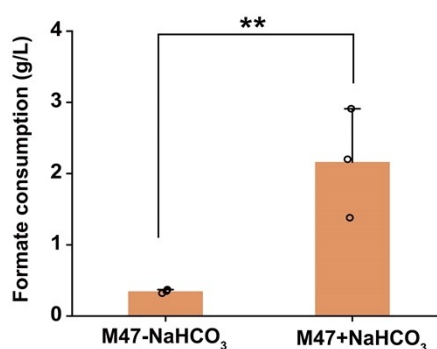

**Supplementary Fig. S4** Comparison of formate consumption in strain M47 in media with and without NaHCO<sub>3</sub>. The consumption of formate in the medium with NaHCO<sub>3</sub>

was significantly higher than that without NaHCO<sub>3</sub>, proving the activity of RGP. Strains were cultured in YNB medium with 0.1% yeast extract, 2% methanol, 250 mM sodium formate, 100 mM (NH<sub>4</sub>)<sub>2</sub>SO<sub>4</sub>, and 100 mM NaHCO<sub>3</sub> at 30°C, 220 rpm.

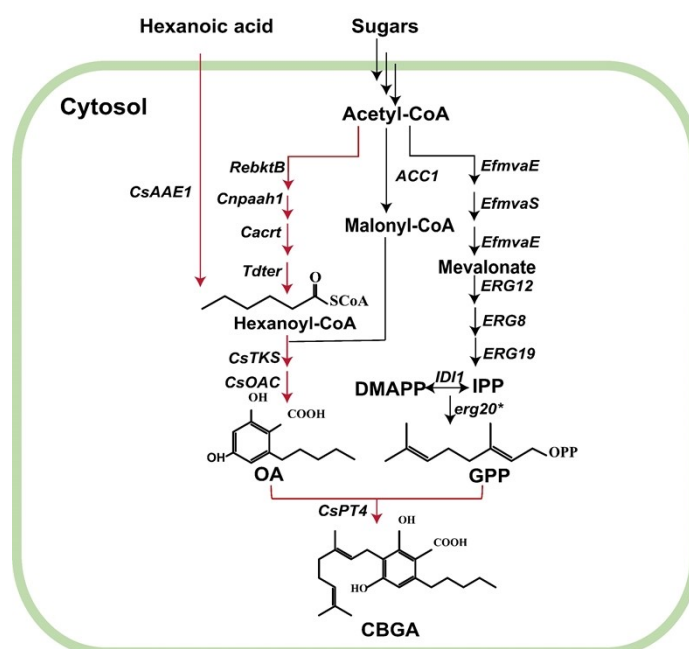

**Supplementary Fig. S5** Biosynthetic pathway of cannabigerolic acid (CBGA) in *S. cerevisiae*. Biosynthetic pathway of CBGA contains heterologous pathway of CBGA (red arrows) and the native pathway of *S. cerevisiae* (black arrows). CsAAE1, acyl activating enzyme from *Cannabis sativa*; ACC1, acetyl-CoA carboxylase; RebktB,  $\beta$ -ketothiolase from *Ralstonia eutropha*; RepaaH1, 3-hydroxybutyryl coenzyme A dehydrogenase from *Ralstonia eutropha*; Cacrt, crotonase from *Clostridium acetobutylicum*; Tdter, trans-2-enoyl-CoA reductase from *Treponema denticola*; CsTKS, polyketide synthase from *C. sativa*; CsOAC, olivetolic acid cyclase from *C. sativa*; CsPT4, geranyl transferase from *C. sativa*; EfmvaE, acetoacetyl-CoA thiolase from *Enterococcus faecalis*; EfmvaS, HMG-CoA synthase from *E. faecalis*; ERG12, mevalonate kinase; ERG8, phosphomevalonate kinase; ERG19, mevalonate pyrophosphate decarboxylase; IDI1, isopentenyl-pyrophosphate delta isomerase; erg20\*, farnesyl pyrophosphate synthetase with F96W/N127W mutation. IPP, isopentenyl diphosphate; DMAPP, dimethylallyl diphosphate; GPP, geranylgeranyl pyrophosphate, OA, olivetolic acid, CBGA, cannabigerolic acid.

**Supplementary Table 1** Thermodynamic analysis of different glycine biosynthetic pathways

| Pathway      | Reactions                                                                                                   | $\Delta_r G'^m$<br>(kJ/mol) |
|--------------|-------------------------------------------------------------------------------------------------------------|-----------------------------|
| RGP          | Formate+THF+ATP $\rightleftharpoons$ 10-formyl-THF+ADP+Orthophosphate                                       | -2.1                        |
|              | 10-formyl-THF $\rightleftharpoons$ 5,10-methenyl-THF+H <sub>2</sub> O                                       | 5.4                         |
|              | 5,10-methenyl-THF+NADPH $\rightleftharpoons$ 5,10-methylene-THF+NADP <sup>+</sup>                           | -6.5                        |
|              | 5,10-methylene-THF+NH <sub>4</sub> +CO <sub>2</sub> +NADH $\rightleftharpoons$ Glycine+THF+NAD <sup>+</sup> | -4.9                        |
| Methanol-RGP | Methanol+O <sub>2</sub> $\rightleftharpoons$ Formaldehyde+H <sub>2</sub> O <sub>2</sub>                     | -98.9                       |
|              | Formaldehyde+THF $\rightleftharpoons$ 5,10-methylene-THF+H <sub>2</sub> O                                   | -5.2                        |
|              | 5,10-methylene-THF+NH <sub>4</sub> +CO <sub>2</sub> +NADH $\rightleftharpoons$ Glycine+THF+NAD <sup>+</sup> | -4.9                        |

**Supplementary Table 2** Plasmids used in this study

| Plasmids                         | Description                                                                              | Source     |
|----------------------------------|------------------------------------------------------------------------------------------|------------|
| p423-SpSgH                       | 2 $\mu$ ; <i>HIS3</i> ; <i>AmpR</i> ; <i>pSNR52-BsaI-BsaI-SpSgRNA-tSUP4</i>              | 2          |
| p426-SpSgH                       | 2 $\mu$ ; <i>URA3</i> ; <i>AmpR</i> ; <i>pSNR52-BsaI-BsaI-SpSgRNA-tSUP4</i>              | 3          |
| p423*-ccdB                       | 2 $\mu$ ; <i>HIS3</i> ; <i>AmpR</i> ; <i>pSNR52-BsaI-ccdB-BsaI-tSUP4</i>                 | 2          |
| p426*-ccdB                       | 2 $\mu$ ; <i>URA3</i> ; <i>AmpR</i> ; <i>pSNR52-BsaI-ccdB-BsaI-tSUP4</i>                 | 3          |
| p41K-iCas9                       | 2 $\mu$ ; <i>KanMX</i> ; <i>AmpR</i> ; <i>pTEF1-iCas9-tADH1</i>                          | 4          |
| pESC-URA                         | 2 $\mu$ ; <i>URA3</i> ; <i>AmpR</i> ; <i>pGAL1-MCS1-tCYC1</i> ; <i>pGAL10-MCS2-tADH1</i> | 2          |
| pH23                             | 2 $\mu$ ; <i>LEU2</i> ; <i>AmpR</i> ; <i>tADH1-pGPD1-eGFP-tCYC1-pENO2</i>                | 2          |
| pH5                              | 2 $\mu$ ; <i>LEU2</i> ; <i>AmpR</i> ; <i>pTEF1-eGFP-TEF1</i>                             | 2          |
| pH66                             | 2 $\mu$ ; <i>LEU2</i> ; <i>AmpR</i> ; <i>tTEF1-pPGK1-eGFP-tHXT7</i>                      | 2          |
| pH5-PFK1                         | 2 $\mu$ ; <i>LEU2</i> ; <i>AmpR</i> ; <i>pTEF1-PFK1-tTEF1</i>                            | this study |
| pH5-PFK2                         | 2 $\mu$ ; <i>LEU2</i> ; <i>AmpR</i> ; <i>pTEF1-PFK2-tTEF1</i>                            | this study |
| pH5-FBA1                         | 2 $\mu$ ; <i>LEU2</i> ; <i>AmpR</i> ; <i>pTEF1-FBA1-tTEF1</i>                            | this study |
| pH7-RPE1                         | 2 $\mu$ ; <i>LEU2</i> ; <i>AmpR</i> ; <i>pTP11-RPE1-tTEF1</i>                            | this study |
| pH7-Bmplgx                       | 2 $\mu$ ; <i>LEU2</i> ; <i>AmpR</i> ; <i>pTP11-Bmplgx-tTEF1</i>                          | this study |
| pH10-BsMDH                       | 2 $\mu$ ; <i>URA3</i> ; <i>AmpR</i> ; <i>pGPM1-BsMDH-tTEF1</i>                           | this study |
| pH9-ADK1                         | 2 $\mu$ ; <i>LEU2</i> ; <i>AmpR</i> ; <i>pTEF2-ADK1-tHXT7</i>                            | this study |
| pH9-FLS                          | 2 $\mu$ ; <i>LEU2</i> ; <i>AmpR</i> ; <i>pTEF2-FLS-tTEF1</i>                             | this study |
| pH5-HPS                          | 2 $\mu$ ; <i>LEU2</i> ; <i>AmpR</i> ; <i>pTEF1-HPS-tTEF1</i>                             | this study |
| pH5-PHI                          | 2 $\mu$ ; <i>LEU2</i> ; <i>AmpR</i> ; <i>pTEF1-PHI-tTEF1</i>                             | this study |
| pH10-AOX1                        | 2 $\mu$ ; <i>LEU2</i> ; <i>AmpR</i> ; <i>pGPM1-AOX1-tTEF1</i>                            | this study |
| pH10-DAK1                        | 2 $\mu$ ; <i>LEU2</i> ; <i>AmpR</i> ; <i>pGPM1-DAK1-tTEF1</i>                            | this study |
| pH11-DAS2                        | 2 $\mu$ ; <i>LEU2</i> ; <i>AmpR</i> ; <i>pENO2-DAS2-tTEF1</i>                            | this study |
| pH11-CAT1                        | 2 $\mu$ ; <i>LEU2</i> ; <i>AmpR</i> ; <i>pENO2-CAT1-tTEF1</i>                            | this study |
| pH7-TKL1                         | 2 $\mu$ ; <i>LEU2</i> ; <i>AmpR</i> ; <i>pTP11-TKL1-tTEF1</i>                            | this study |
| pH23-FBP1                        | 2 $\mu$ ; <i>LEU2</i> ; <i>AmpR</i> ; <i>pGPD1-FBP1-tCYC1</i>                            | this study |
| pH23-ZWF1                        | 2 $\mu$ ; <i>LEU2</i> ; <i>AmpR</i> ; <i>pGPD1-ZWF1-tCYC1</i>                            | this study |
| pH12-GCV1                        | 2 $\mu$ ; <i>LEU2</i> ; <i>AmpR</i> ; <i>pFBA1-GCV1-tTEF1</i>                            | this study |
| pH12-GCV2                        | 2 $\mu$ ; <i>LEU2</i> ; <i>AmpR</i> ; <i>pFBA1-GCV2-tTEF1</i>                            | this study |
| pH13-GCV3                        | 2 $\mu$ ; <i>LEU2</i> ; <i>AmpR</i> ; <i>pPDC1-GCV3-tCYC1</i>                            | this study |
| pH13-MIS1                        | 2 $\mu$ ; <i>LEU2</i> ; <i>AmpR</i> ; <i>pPDC1-MIS1-tCYC1</i>                            | this study |
| pH23-SHM2 <sup>A194C/S248T</sup> | 2 $\mu$ ; <i>LEU2</i> ; <i>AmpR</i> ; <i>pGPD1-SHM2<sup>A194C/S248T</sup>-tCYC1</i>      | this study |

**Supplementary Table 3** Strains used in this study



| Strains | Description                                                                                                                                                                                                                                                                                                                                                                                                                                                                                                                                                                                                                                                                                                                                                                                                                                                                                                                                                                                                         | Source     |
|---------|---------------------------------------------------------------------------------------------------------------------------------------------------------------------------------------------------------------------------------------------------------------------------------------------------------------------------------------------------------------------------------------------------------------------------------------------------------------------------------------------------------------------------------------------------------------------------------------------------------------------------------------------------------------------------------------------------------------------------------------------------------------------------------------------------------------------------------------------------------------------------------------------------------------------------------------------------------------------------------------------------------------------|------------|
| INVSc1  | <i>MATa/MATa his 3Δ1 leu2 trp 1-289 ura3-52</i>                                                                                                                                                                                                                                                                                                                                                                                                                                                                                                                                                                                                                                                                                                                                                                                                                                                                                                                                                                     | Lian's lab |
| M01     | INVSc1[ <i>YPRCδ15c::pPGK1-Tdter-tHXT7; SAP155b::pTEF1-RebktB-tTEF1;1414a::pGAL1-EfmvaS-tCYC1/pGAL10-EfmvaE-tADH1; 1114a::pGAL1-ERG12-tCYC1/pGAL10-IDI-tADH1;SAP155c::pGAL1-RePaaH1-tCYC1/pGAL10-CaCrt-tADH1;1014a::pGAL1-ERG19-tCYC1/pGAL10-ERG8-tADH1; 1622b:: pGAL1-CsOAC-tCYC1/pGAL10-CsTKS-tADH1;911b:: pGPD1-CsAAE1-tCYC1; 1021b::pGAL1-tHMG1-tCYC1/pGAL10-erg20*-tADH1; 416d::pGAL1-CsPT4-tCYC1; 308a::pGAL1-CBCAS-tCYC1; X4:: pGAL1-CsOAC-tCYC1/pGAL10-CsTKS-tADH1;XI3:: pGAL1-CsOAC-tCYC1/pGAL10-CsTKS-tADH1;XII5:: pGAL1-CsOAC-tCYC1/pGAL10-CsTKS-tADH1;208a:: pGPD1-CsAAE1-tCYC1;106a:: pGPD1-CsAAE1-tCYC1; CAN1y::pGAL1-CsPT4-tCYC1;YOLCd1b::pGAL1-CsPT4-tCYC1; 1021b:: pGAL10-erg20*-tADH1; XII::pTEF1-CHK-tTEF1;X12::pTEF1-AuPK-tTEF1; XII4::pPGK1-FAA2-tHXT7; X2::pGAL1-IDI1-tCYC1; X3:: pTEF1-ERO1-tTEF1; NS7:: pPGK1-IRE1*-tHXT7; NS8:: pPGK1-PDI1-tHXT7; NS9:: pPGK1-CNE1-tHXT7; NS2:: pTEF1-INO2-tTEF1; NS3::pPGK1-KAR2-tHXT7; NS14:: pPGK1-HAC1s*-tHXT7; YGLCτ3:: pTEF1-ERO1-tTEF1; Gal80Δ]</i> | This study |
| M02     | M01[ <i>NS18:: pTEF1-HPS-tTEF1; NS19:: pTEF1-PHI-tTEF1</i> ]                                                                                                                                                                                                                                                                                                                                                                                                                                                                                                                                                                                                                                                                                                                                                                                                                                                                                                                                                        | This study |
| M06     | M02[ <i>NS22:: pTEF1-PFK2-tTEF1; NS23:: pTEF1-FBA1-tTEF1;YORWΔ22:: pTEF1-PFK1-tTEF1;NS24:: pTPI1-RPE1-tTEF1; NS25:: pTPI1-Bmg1px-tTEF1; NS10:: pGPM1-BsMDH-tTEF1; NS11:: pGPM1-BsMDH-tTEF1</i> ]                                                                                                                                                                                                                                                                                                                                                                                                                                                                                                                                                                                                                                                                                                                                                                                                                    | This study |
| M07     | M06[ <i>NS5:: pTEF2-ADK1-tTEF1; NS6:: pTEF2-FLS-tTEF1</i> ]                                                                                                                                                                                                                                                                                                                                                                                                                                                                                                                                                                                                                                                                                                                                                                                                                                                                                                                                                         | This study |
| M09     | M06[ <i>XI7:: pGPM1-AOX1-tTEF1;XI8:: pGPM1-DAK1-tTEF1;YCRWδ12:: pENO2-DAS2-tTEF1;YNRCΔ9::pENO2-CAT1-tTEF1</i> ]                                                                                                                                                                                                                                                                                                                                                                                                                                                                                                                                                                                                                                                                                                                                                                                                                                                                                                     | This study |
| M14     | M09[ <i>V1::pGPD1-FBP1-tCYC1;V3::pGPD1-ZWF1-tCYC1; NS17:: pGPD1-TKL1-tCYC1; YGR067C:: tYGR067C</i> ]                                                                                                                                                                                                                                                                                                                                                                                                                                                                                                                                                                                                                                                                                                                                                                                                                                                                                                                | This study |
| M15     | M14[ <i>LPL1Δ;IZH3Δ</i> ]                                                                                                                                                                                                                                                                                                                                                                                                                                                                                                                                                                                                                                                                                                                                                                                                                                                                                                                                                                                           | This study |
| M27     | M15-G80-2                                                                                                                                                                                                                                                                                                                                                                                                                                                                                                                                                                                                                                                                                                                                                                                                                                                                                                                                                                                                           | This study |
| M29     | M15-G80-2-1                                                                                                                                                                                                                                                                                                                                                                                                                                                                                                                                                                                                                                                                                                                                                                                                                                                                                                                                                                                                         | This study |
| M45     | M29[ <i>4-OH:: pGPD1-SHM2<sup>A194CS248T</sup>-tCYC1</i> ]                                                                                                                                                                                                                                                                                                                                                                                                                                                                                                                                                                                                                                                                                                                                                                                                                                                                                                                                                          | This study |
| M47     | M45[ <i>NS20::pFBA1-GCV1-tTEF1;NS21::pFBA1-GCV2-tTEF1; XII3:: pPDC1-GCV3-tCYC1; XI5::pPDC1-MIS1-tCYC1</i> ]                                                                                                                                                                                                                                                                                                                                                                                                                                                                                                                                                                                                                                                                                                                                                                                                                                                                                                         | This study |

**Supplementary Table 4** List of primers used in this study

| primers                          | sequences (5'-3')                                                |
|----------------------------------|------------------------------------------------------------------|
| <b>for plasmids construction</b> |                                                                  |
| IDP2-F                           | ACACCAGAACTTAGTTTCGACGGATGGATCCATGACAAAGATTAAGGTAGCTAAC<br>CC    |
| IDP2-R                           | GCGTGACATAACTAATTACATGATCTCGAGTTACAATGCAGCTGCCTCGAA              |
| PFK1-F                           | CTAATCTAAGTTTTAATTACAAAGGATCCATGCAATCTCAAGATTCATGCT              |
| PFK1-R                           | TATGCAACTAGAAAAGTCTTATCAATCTCCCTCGAGTCATTTGTTTCAGCGGCTA<br>AAG   |
| PFK2-F                           | TCTAATCTAAGTTTTAATTACAAAGGATCCATGACTGTTACTACTCCTTTGTGAA<br>TG    |
| PFK2-R                           | ACTAGAAAAGTCTTATCAATCTCCCTCGAGTTAATCAACTCTCTTCTTCCAACCA<br>A     |
| FBA1-F                           | CTAATCTAAGTTTTAATTACAAAGGATCCATGGGTGTTGAACAAATCTTAA              |
| FBA1-R                           | AGAAAACGTCTTATCAATCTCCCTCGAGTTATAAAGTGTTAGTGGTACGGAAAG           |
| GCV1-F                           | AACCAAGTAATACATATTCAAAAGGATCCATGTCTATAATCAAAAAAATTGTGTT<br>TAAG  |
| GCV1-R                           | AGAAAAGTCTTATCAATCTCCCTCGAGTTACTGCTTGTAGTAATGTGTGG               |
| GCV2-F                           | AACCAAGTAATACATATTCAAAAGGATCCATGCTTAGGACAAGAGTGACT               |
| GCV2-R                           | AAAGTCTTATCAATCTCCCTCGAGTCATTCAGTTTCGTTTCGCAATTC                 |
| GCV3-F                           | AATCTAAGTTTTAATTACAAAGGATCCATGTTACGCACTACTAGACTATG               |
| GCV3-R                           | AAAAGTCTTATCAATCTCCCTCGAGTCAGTCATCATGAACCAGTGTCT                 |
| MIS1-F                           | ACACAGTCAAATCAATCAAAGGATCCATGTTGTCGAGACTATCTTTATTGAGT            |
| MIS1-R                           | TGACATAACTAATTACATGATCTCGAGTTAAAATAGACCTTCAATTCACC               |
| <b>for genome integration</b>    |                                                                  |
| HPS-HOMO-F                       | GCAAAATAGTATACCATCTTTGGTTCCTGGACCACATTTTCGCGCGTAATACGAC<br>TCAC  |
| HPS-HOMO-R                       | AAAGGGTTCGCTCAATGGCAGATGCTGCCATACGAGGACAATAGCGCCGATCAA<br>AGTAT  |
| PHI-HOMO-F                       | AACTCCGTCCACAGTACCCGATCAGCTGGCTCATCGTTATGCGCGCGTAATACGA<br>CTCA  |
| PHI-HOMO-R                       | CTTGCAACGCTAGTAACGCCGATCCACAGAGAAACCGGGATAGCGCCGATCAA<br>AGTAT   |
| PFK2-HOMO-F                      | AAGGTTGGCCCGCCAAAATCGTAAGTCTCGGTGCTCTGTTGCGCGCGTAATACGA<br>CTCA  |
| PFK2-HOMO-R                      | TTACTGGAGTAATGCTTATATTTCGCGTCCCCCACGCATAGCGCCGATCAAA<br>GTAT     |
| FBA1-HOMO-F                      | TGTGGTGAATGCACCTGGTGCACGCTGCGAAGGTGACGTAGAGCGCGCGTAATA<br>CGACT  |
| FBA1-HOMO-R                      | TGGCTTTTAACTTATTACCCCAAGAGAGTGTCTACAGAAATAGCGCCGATCAAA<br>GTAT   |
| PFK1-HOMO-F                      | TCTTTTAAATACTTATTAACGTACTCAAACAACACTACTTTGAGCGCGCGTAATA<br>CGAC  |
| PFK1-HOMO-R                      | GGTCCCTATTCCGATAATCTTAGCAGAGTGAATAGTAATAATAGCGCCGATCAAA<br>GTAT  |
| RPE1-HOMO-F                      | CATTAGATAGAGAGGGGCGAGATGTTCAAGCTATACCCATTCTACTTATTCCCTTC<br>GAGA |
| RPE1-HOMO-R                      | ACTGAAATGAAAATTCATATTTACTTTTTATTGTTACTGACCATGATTACGCCA<br>AGC    |
| Bmg1px-HOMO-F                    | CCTAATTAGTAGGAAGCGGAAAATAATAATATAAGAAAGTCTACTTATTCCCTTC<br>GAGA  |
| Bmg1px-HOMO-R                    | TTGCGCGCTCAAGCGGCCCTATACTGCACACCTATTACTTGACCATGATTACGCC<br>AAGC  |
| BsMDH-HOMO-F                     | ACTTTTTACCATCCTTTAGCTTTACCTAATATAATGAAATTAGTCGTGCAATGTAT<br>GAC  |
| BsMDH-HOMO-R                     | TTCGAGAAATAGTTGGTATAAATAACTATAAATAACGTTTATAGCGCCGATCAAA<br>GTAT  |
| BsMDH-HOMO-                      | AACTAACCTAAGAATTTTGAAATCACAACAAAAATAATTAGTCGTGCAATGTATG          |

|                                           |                                                                   |
|-------------------------------------------|-------------------------------------------------------------------|
| F                                         | AC                                                                |
| BsMDH-HOMO-R                              | ACAAAAAAGTAGTAATAAATAGGTCCAAATCTTCTTTATTATAGCGCCGATCAAA<br>GTAT   |
| ADK1-HOMO-F                               | CATTTGAATTTTAGTAGTAATAATAAGATCCCATCCGGGCGCCATAACCAA<br>GGTA       |
| ADK1-HOMO-R                               | TCATCTATAAAGACTGTACGCATATTTGGAACAACTGCTATAGCGCCGATCAAA<br>GTAT    |
| FLS-HOMO-F                                | ACATTTCAAGTGGTTTCTCAAGGGAGAATCATAGTTTAGCGGGCGCCATAACCAA<br>GGTA   |
| FLS-HOMO-R                                | CTTCGTATACTTATTACGCAGGTAGGAGTGCAATAGTTGAATAGCGCCGATCAAA<br>GTAT   |
| AOX1-HOMO-F                               | CTTGACATGTAACGTAAGAAAAGAAAAAGAGATGGCAGATAGTCGTGCAATGT<br>ATGAC    |
| AOX1-HOMO-R                               | AATCATTGCTATCCCCACAAAAACAGTGCATGTACTTTGATAGCGCCGATCAAA<br>GTAT    |
| DAK1-HOMO-R                               | TTTTTGCCATACATTTAGCGCTCCACACTCTAAATAAAGTGTGTCGACGCTGCGG<br>GTAT   |
| DAK1-HOMO-F                               | TTTATAATATGCAAAAGGCGGTAACGATATGCCGCGCAAAATAGCGCCGATCAA<br>AGTAT   |
| DAS2-HOMO-F                               | GCCGATGAAATAAAATCCTGATATCATCTATATAGTAGTGTGTCGACGCTGCGGG<br>TAT    |
| DAS2-HOMO-R                               | TGAAGATATATGAATCTACAAGAGAGAGTCAATATTTCTAATAGCGCCGATCAA<br>AGTAT   |
| CAT1-HOMO-F                               | AGACATTTTTTGGGATTAATTGTTTATAAAAAGCTATGAACGTGTCGACGCTGCGG<br>GTAT  |
| CAT1-HOMO-R                               | GACATAATTGATGGGAAACAGTTATCAAAGTTATTGGATGATAGCGCCGATCAA<br>AGTAT   |
| TKL1-HOMO-R                               | GATCTGTGAAGGTTTTGAGAGAATGAGGCGAAAACACAGGCTACTTATTCCCTTC<br>GAGA   |
| TKL1-HOMO-F                               | AAGCGAGTGATTCATCATGAAAAGAATTTATCACTTCGAAATAGCGCCGATCAA<br>AGTAT   |
| YGR067C-HOMO-F                            | TTTTATTTAAACCTTCTCTCGGGAGAAGACAATTGTTGAATGGCTGCGGGTCAA<br>AAAA    |
| YGR067C-HOMO-R                            | GCTCTTGCGGATAAGTCTTCTTTATTATAAAAATACACTTACGCGGAATCTGCCAA<br>AATA  |
| FBP1-HOMO-F                               | GTGGAAAATGACCATAATGATAATTATCAATAGATAAAATCCACACCTCTACCG<br>GCATG   |
| FBP1-HOMO-R                               | CTAAAATGGTAGGCATGAGTGTCTCTCTTGTGTGCTGCAAATTAAGCCTTC<br>GAG        |
| ZWF1-HOMO-F                               | TGAAGACTACTGAACCATGGCAGCTAATACAATCACGCCCCACACCTCTACCGG<br>CATG    |
| ZWF1-HOMO-R                               | AAAAAGGCTAGGTACTTTAAAAATTTCTACAAATATAGAGCAAATTAAGCCTT<br>CGAG     |
| GCV1-HOMO-F                               | ATAAGCCCTAGAAACCTTACACCCTAATTTGCACAAGAAATAACAATACTGACA<br>GTACTAA |
| GCV1-HOMO-R                               | CATCTGGAATATAATTCCCCCTCTGAAGCAAATTTTTCATAGCGCCGATCAAA<br>GTAT     |
| GCV2-HOMO-F                               | CATCATATAGGGACATACCTCTCAAGTTATTGTCTTGATAACAATACTGACAGT<br>ACTAAAT |
| GCV2-HOMO-R                               | TCCAGGCAGGACGACACGAGAATAGACGGGCTGATCCCGTATAGCGCCGATCAA<br>AGTAT   |
| GCV3-HOMO-F                               | GACACATCTCTAAGCTGAAACTGAGAATACTGTTGTA AAAACATGCGACTGGGTG<br>AGCAT |
| GCV3-HOMO-R                               | AAGTCCATTACCCTTAAGGTTGTTGTCACAACCCACGGAGGCAAATTAAGCCTT<br>CGAG    |
| MIS1-HOMO-F                               | AAGCTTCGAAGAATATGTAAATATAGTAGTATGAATCTAACATGCGACTGGGTG<br>AGCAT   |
| MIS1-HOMO-R                               | GAGTGT CATATATCCCTCCTTTAAATTTTTTACACTTACGCAAATTAAGCCTTC<br>GAG    |
| <i>SHM2<sup>A194C/S248T</sup></i> -HOMO-F | TACATACAACCTTTTTAAACTAATATACACATTTTAGCAGACCACACCTCTACCGG<br>CATG  |
| <i>SHM2<sup>A194C/S248T</sup></i> -HOMO-R | ATCCTCATAAGCAGCAATCAATTCTATCTATACTTTAAAAGCAAATTAAGCCTT<br>CGAG    |
| LPL1-UP-F                                 | CCTCAACATTTATCAAATAGTTTAGCAATG                                    |
| LPL1-UP-R                                 | TCGAATTTACGGCCAATTAAGTAGC                                         |

|             |                                                       |
|-------------|-------------------------------------------------------|
| LPL1-DOWN-F | CTAGTAATTGGGCCGTAAATTCGATGAAGCGCTGTATAATATATATATGGTTG |
| LPL1-DOWN-R | TTGAAGCAAGATATTGGAAAGACAAGGG                          |
| IZH3-UP-F   | ACTACTGCATGAAATCACTTAAGTTCG                           |
| IZH3-UP-R   | GGTATGACTGACTACCTTTACTTACAA                           |
| IZH3-DOWN-F | TAAGTAAAGGTAGTCAGTCATACCTACTTAATTTGATTGTCTGTTGGGA     |
| IZH3-DOWN-R | CTACGAAATTAGCGTATCCGAAAA                              |

### Supplementary Table 5 Mutations in different evolved strains

| Protein | M29-1 | M29-2 | M29-3 | Annotation                                                                                                                                                      |
|---------|-------|-------|-------|-----------------------------------------------------------------------------------------------------------------------------------------------------------------|
| AAD4    | C23F  |       | C23F  | Enables aryl-alcohol dehydrogenase (NADP+) activity. Predicted to be involved in cellular aldehyde metabolic process.                                           |
| AAD10   | F33Y  |       | F33Y  | Enables aryl-alcohol dehydrogenase (NADP+) activity. Predicted to be involved in cellular aldehyde metabolic process.                                           |
| DAN4    | P216S |       | P216S | Predicted to be involved in fungal-type cell wall organization.                                                                                                 |
| GDA1    | V208I |       | V208I | Enables GDP phosphatase activity and UDP phosphatase activity. Involved in protein glycosylation.                                                               |
| ADP1    | K26I  |       | K26I  | Predicted to enable ATPase-coupled transmembrane transporter activity.                                                                                          |
| RPL30   | I92T  |       | I92T  | Involved in negative regulation of mRNA splicing, via spliceosome and rRNA processing.                                                                          |
| TGL3    | A12D  |       | A12D  | Involved in cell budding and triglyceride catabolic process.                                                                                                    |
| COS2    |       | R311K | R311K | Predicted to be involved in protein transport to vacuole involved in ubiquitin-dependent protein catabolic process via the multivesicular body sorting pathway. |
| YHR219W | S251P | S251P |       | Predicted to be active in cytoplasm.                                                                                                                            |
| YMR317W | E323A | E323A |       | No found.                                                                                                                                                       |
| COS6    | V89F  |       |       | Predicted to be involved in protein transport to vacuole involved in ubiquitin-dependent protein catabolic process via the multivesicular body sorting pathway. |
| PAU4    | I24L  |       |       | Predicted to be involved in fungal-type cell wall organization.                                                                                                 |
| PFF1    |       | V372F |       | Predicted to enable metalloexopeptidase activity and zinc ion binding activity. Predicted to be involved in proteolysis.                                        |
| YPS5    |       | I39T  |       | Predicted to enable aspartic-type endopeptidase activity.                                                                                                       |
| KEX1    |       | A200V |       | Involved in apoptotic process.                                                                                                                                  |
| LSG1    |       | G494W |       | Involved in ribosomal large subunit assembly and ribosomal subunit export from nucleus.                                                                         |

|      |       |                                                                                                                                                                                      |
|------|-------|--------------------------------------------------------------------------------------------------------------------------------------------------------------------------------------|
| NAM8 | A363G | Enables mRNA binding activity. Involved in mRNA splice site recognition and positive regulation of mRNA splicing, via spliceosome. Located in cytoplasm and nucleus.                 |
| INA1 | D42N  | Predicted to be involved in fungal-type cell wall organization.                                                                                                                      |
| RAS2 | K124T | Involved in several processes, including cytoplasm to vacuole targeting by the Cvt pathway; positive regulation of transcription by galactose; and protein localization to bud neck. |

### Supplementary Table 6 Integration site used in this study

| site    | 20 bp spacer (5'-3')  |
|---------|-----------------------|
| NS5     | GAGAGAATGACATTGCTCAG  |
| NS6     | TAGTTAATATCATCTAGATG  |
| NS10    | ATATAAAAAAATTCTTACTA  |
| NS11    | TATTCTTAGGAAAATCAACA  |
| NS17    | CTTGCGAAAAGAAAAGGGCA  |
| NS18    | AACTGCTCAGGGCGGATAAC  |
| NS22    | ATCTTAAATGAAAAGACAGAG |
| NS24    | ATTATGAAAGTTTCAACTA   |
| NS25    | CACCATTCAAGTTACCGAGA  |
| YORWΔ22 | CGTTTGGGTAGTTCAGCTAA  |
| YCRWδ12 | TTTAATGGAAACGAAATGCA  |
| YNRCΔ9  | GCACGGAACCTCGGACCTAG  |
| XI7     | GTCAGTAACAGTGATTGCTG  |
| XI8     | GATGAAATAGCCTCAGTTAC  |
| V1      | CGTTTATAGACGGCACTGTC  |
| V3      | GTGCTCTTAAGTCGTAATGA  |
| X1      | GTGCCTGCTGCTATGCTCAA  |
| III3    | AGACATATGATAATCGAGCA  |
| 4-OH    | GTTTCGTGAAGCATTCTTAGC |

### Supplementary Table 7 Heterologous genes used in this study

| genes        | gene sequence (5'-3')                                                                                                                                                                                                                                                                                                                                                                                                                                                                                                                                                                                                                                                                                                                                                                                                            |
|--------------|----------------------------------------------------------------------------------------------------------------------------------------------------------------------------------------------------------------------------------------------------------------------------------------------------------------------------------------------------------------------------------------------------------------------------------------------------------------------------------------------------------------------------------------------------------------------------------------------------------------------------------------------------------------------------------------------------------------------------------------------------------------------------------------------------------------------------------|
| <i>BsMDH</i> | ATGAAAGCTGCTGTTGTTAATGAATTTAAGAAAGCTTTGGAAATTAAGAAGTTGAAA<br>GACCAAAATTGGAAGAAGGTGAAGTTTTGGTTAAAATTGAAGCTTGTGGTGTGTTGTC<br>TACTGATTTGCATGCTGCTCATGGTGATTGGCCAATTAACCAAAAATTGCCATTGATTC<br>CTGGTCATGAAGGTGTTGGTATTGTTGTTGAAGTTGCTAAAGGTGTTAAATCTATTA<br>GTTGGTGATAGAGTTGGTATTCCATGGTTGATTCTGCTTGTGGTGAATGTGAATATTG<br>TTGACTGGTCAAGAACTTTGTGTCCACATCAATTGAATGGTGGTTATTCTGTTGATG<br>GTGGTTATGCTGAATATTGTAAGCTCCTGCTGATTATGTTGCTAAAATTCCTGATAAT<br>TTAGATCCTGTTGAGGTCGCTCCTATTTTGTGTGCTGGTGTACTACTATAAAGCTTTG<br>AAAGTTTCTGGTGTAGACCTGGTGAATGGGTTGCTATTTATGGTATTGGTGGTTGGG<br>TCATATTGCTTTGCAATATGCTAAAGCTATGGGTTGAATGTTGTTGCTGTTGATATTT<br>TGATGAAAAATCTAAATTGGCTAAAGATTTGGGTGCTGATATTGCTATTAATGGTTGA<br>AAGAAGATCCTGTTAAAGCTATTCATGATCAAGTTGGTGGTGTTCATGCTGCTATTTCT<br>GTTGCTGTTAATAAAAAGGCTTTTGAACAAGCTTATCAATCTGTTAAAAGAGGTGGTA |

|              |                                                                                                                                                                                                                                                                                                                                                                                                                                                                                                                                                                                                                                                                                                                                                                                                                                                                                                                                                                                                                                                                                                                                                                                                                                                                                                                             |
|--------------|-----------------------------------------------------------------------------------------------------------------------------------------------------------------------------------------------------------------------------------------------------------------------------------------------------------------------------------------------------------------------------------------------------------------------------------------------------------------------------------------------------------------------------------------------------------------------------------------------------------------------------------------------------------------------------------------------------------------------------------------------------------------------------------------------------------------------------------------------------------------------------------------------------------------------------------------------------------------------------------------------------------------------------------------------------------------------------------------------------------------------------------------------------------------------------------------------------------------------------------------------------------------------------------------------------------------------------|
|              | <p>CTTTGGTTGTCGTTGGTTTGCCAAATGCTGATTTGCCAATTCCAATTTTTGATACTGTTT<br/> TGAATGGTGTCTCTGTTAAAGGTTCTATTGTTGGTACTAGAAAAGATATGCAAGAAGCT<br/> TTGGATTTTGCTGCTAGAGGTAAGTTAGACCAATTGTTGAAACTGCTGAGTTGGAAG<br/> AAATTAATGAAGTTTTTGAGAGAATGGAGAAAAGGTAATAATGGTAGAATTGTTTT<br/> GAAATTGAAAGAAGACTAA</p>                                                                                                                                                                                                                                                                                                                                                                                                                                                                                                                                                                                                                                                                                                                                                                                                                                                                                                                                                                                                                                  |
| <i>BmHPS</i> | <p>ATGGAATTGCAATTGGCTTTGGATTTGGTTAATATTGAAGAAGCAAAACAAGTTGTTG<br/> CTGAAGTTCAAGAATATGTTGATATTGTTGAAATTGGTACTCCTGTTATTAATAATTTGG<br/> GGTTTGCAAGCTGTTAAGGCTGTTAAAGATGCTTTTCCACATTTGCAAGTTTTGGCTGA<br/> TATGAAAACATATGGATGCTGCAGCTTATGAAGTTGCTAAAGCTGCTGAACATGGTGT<br/> GATATTGTTACTATTTTGGCTGCAGCTGAGGACGTTTCTATTAAGGTTGCTGTTGAGGA<br/> AGCTAAAAAATTGGGTAAAAAAATTTTGGTTGATATGATTGCTGTTAAAAATTTGGAA<br/> GAAAGAGCAAAGCAAGTTGACGAAATGGGTGTTGATTATATTTGTGTTTCATGCTGGTT<br/> TGATTTACAAGCTGTTGGTAAGAATCCATTGGATGATTTGAAAAGAATTAAGCTGT<br/> TTGTTAAAAATGCTAAAACCTGCTATTGCTGGTGGTATTAAATTGGAAACTTTGCTGAA<br/> TTATTAAGCTGAACCTGATTTGGTTATTGTTGGTGGAGGTATTGCTAATCAAACCTGAT<br/> AAAAAGCTGCAGCTGAAAAAATTAATAAATTGGTTAAACAAGGTTTGTAAACTTTAC<br/> GCCGAGAGGCTTTATAGGAAGGACGGTACCATCCCAGTCGACGAGGAAAATAGAATT<br/> AGAATCGATGACTGGGAACCTTGAGGAGGACGTCCAGAAAAGCCGTTTCTGCCTTGATGG<br/> AGAAGGTCACCGGTGAAAATGCCGAGAGTTTGACCGACTTGCCGGTTACAGACACG<br/> ACTTCTTGCCAGTAACGGTTTTGACGTTGAGGGAATCAACTACGAGGCCGAAGTTGA<br/> GAGGTTCCACAGAATCTAA</p>                                                                                                                                                                                                                                                                                                |
| <i>BmPHI</i> | <p>ATGTTGACTACTGAATTTTTGGCTGAAATTGTTAAAGAATTGAATTCTTCTGTTAATCA<br/> AATTGCTGATGAAGAAGCTGAAGCTTTGGTTAATGGTATTTTGCAATCTAAAAAAGTTT<br/> TTGTTGCTGGTGTCTGGTAGATCTGGTTTTATGGCTAAATCTTTGCTATGAGAATGATG<br/> CATATGGGTATTGATGCTTATGTTGTTGGTGAACCTGTTACTCCAAATTATGAAAAAGA<br/> AGATATTTTGATTATTGGTTCTGGTTCTGGTGAACCTAAATCTTTGGTTTCTATGGCTCA<br/> AAAAGCTAAATCTATTGGTGGTACTATTGCTGCTGTTACTATTAATCCTGAATCTACTA<br/> TTGGTCAATTGGCTGATATTGTTATTAATAATGCCTGGTTCTCCAAAAGATAAATCTGAA<br/> GCTAGAGAAACTATTCAACCAATGGGATCTTTGTTTGAACAGACATTGTTATTGTTCTA<br/> TGATGCTGTTATCTTGAGATTTATGAAAAAAAAGGTTTGGATACTAAAACCTATGTAT<br/> GGTAGACATGCTAATTTGGAATAA</p>                                                                                                                                                                                                                                                                                                                                                                                                                                                                                                                                                                                                                                                                                   |
| <i>Bmgpx</i> | <p>ATGAGAGAATTGAAGTCAGAAAAAAGAGTTCAATCTTTGGCTATGGAATTTTTGTCTG<br/> TTGCTCAACAAGCTGCTTTGGCTCTTATCCATGGATTGGTAAAGGTAATAAAAAATGAA<br/> GTTGATAGAGCTGGTACTGAAGCTATGAGAAAATAGATTGAATTTGATTGATATGTCTG<br/> GTTTGATTGTTATTGGTGAAGGTGAAATGGATGAAGCTCCAATGTTGATATTTGGTGAA<br/> GAATTGGTACTGGTAAAGGTCCACAATTGGATATTGCTGTTGATCCTTGTTGATGGTGA<br/> TGGTTTGATGGCTAAAGGTATGGATAATTCTATTGCTGTTATTGCTGCTTCTACTAGAG<br/> GTTCTTTGTTGCATGCTCCTGATATGTATATGGAAAAAATTGCTGTTGGTCCAAAAGCT<br/> AAAGGTTGTGTTAATTTGGATGCTTCTTTGACTGAAAATATGAAATCTGTTGCTAAAGC<br/> TTTGGGTAAAGATTTGAGAGAATTAACCTGTTATGATTCAAGATAGACCAAGACATGAT<br/> CATTTGATTCAACAAGTTAGAGATGTTGGTGTAGATTGAAAATGTTTTCTGATGGTGA<br/> TGTTACTAGAGCTATTGGTACTGCTTTGGAAGAAGTTGATGTTGATATTTGGTTGGTA<br/> CTGGTGGTCTCCTGAAGGTGTTATCGCTGCTACTGCTTTGAAATGTTTGGTGGTGAT<br/> TTTCAAGGTAGATTGGCTCCTCAAAATGAAGAGGAATTTGACAGATGTATCACTATGG<br/> GTATTACTGACCCTAGAAAAATCTTACTATTGATGAAATTTGTTAAATCAGATGATTGT<br/> TTTTTTGTTGCTACTGGTATTACAGATGGTTTGTGATTAATGGTATTAGAAAAAAGA<br/> AGACGGTTTGATGCAAACCTCATT</p>                                                                                                                                                                                                                                                                                      |
| <i>PpAOX</i> | <p>ATGGCTATCCCCGAAGAGTTTGATATCCTAGTTCTAGGTGGTGGATCCAGTGGATCCTG<br/> TATTGCCGGAAGATTGGCAAACCTTGACCCTCTTGAAGTTGGTCTTATCGAAGCA<br/> GGTGAGAACAACCTCAACAACCCATGGTCTACCTCCAGGTATTTACCAAGAAACA<br/> TGAAGTTGGACTCCAAGACTGCTTCTTCTACACTTCAACCCATCCTCACTTGAAT<br/> GGTAGAAGAGCCATTGTTCCATGTGCTAACGTCTTGGGTGGTGGTTCTTCTATCAACTT<br/> CATGATGTACACCAGAGGTTCTGCTTCTGATTACGATGACTTCCAAGCCGAGGGCTGG<br/> AAAACCAAGGACTTGCTTCCATTGATGAAAAAGACTGAGACCTACCAAGAGCTTGCA<br/> ACAACCTGACATTCACGGTTTTCGAAGGTCCAATCAAGGTTTCTTTCCGGTAACTACACC<br/> TACCCAGTTTGCCAGGACTTCTTGAGGGCTTCTGAGTCCCAAGGTATTCCATACGTTGA<br/> CGACTTGAAGACTTGGTTACTGCTCAGGTGCTGAACACTGGTTGAAGTGGATCAAC<br/> AGAGACTGGTCTGCTTCCGACTCTGCTCATGCTCATTTGTCATTTGTCCTACTATGAGAAA<br/> CCACGACAACCTTGTACTTGTACTGTAACACGAAGGTGACAAAATTTGTCGAAGAC<br/> GGAAGAGCTGCTGCTGTTAGAACCGTTCCAAGCAAGCCTTTGAACCCAAAGAAGCCAA<br/> GTCACAAGATCTACCGTGCTAGAAAGCAAATCGTTTGTCTTGTGGTACCATCTCCTCT<br/> CCATTGGTTTTGCAAAGATCCGGTTTTGGTGACCCAATCAAGTTGAGAGCCGCTGGTGT<br/> TAAGCCTTTGGTCAACTTGCCAGGTGTCGGAAGAAAATTTCAAGACCACTACTGTTTCT<br/> TCAGTCTTACAGAATCAAGCCTCAGTACGAGTCTTTTCGATGACTTCGTCGGTGGTGT<br/> GCTGAGATTCAAAAGAGAGTCTTTGACCAATGGTACGCCAATGGTACTGCTCCTCTTG<br/> CCACTAACGGTATCGAAGCTGGTGTCAAGATCAGACCAACACCAGAAGAACTCTCTCA<br/> AATGGACGAATCCTTCCAGGAGGTTACAGAGAATACTTCCAAGACAAGCCAGACAA</p> |

---

GCCAGTTATGCACTACTCCATCATTGCTGGTTTCTTCGGTGACCACACCAAGATTCCCTC  
CTGGAAAGTACATGACTATGTTCCACTTCTTGGAAATACCCATTCTCCAGAGGTTCCATT  
CACATTACCTCCCCAGACCCATACGCAGCTCCAGACTTCGACCCAGGTTTCATGAACG  
ATGAAAGAGACATGGCTCCTATGGTTTGGGCTTACAAGAAGTCTAGAGAAACCGCTAG  
AGAATGGACCACCTTGGCCGGTGAGGTCACCTCTCACCACCCTCTGTTCCCATACTCAT  
CCGAGGCCAGAGCCTTGGAAATGGATTTGGAGACCTTAATGCCTACGGTGGACCTTT  
GAACTTGCTGCTGGTCTTGTCTACGGTCTTGGACTCAACCTTTGAAGAAGCCAAGT  
CAAAGAACGAAGGCCACGTTACTTCGAACCAGGTCGAGCTTCATCCAGACATCGAGTA  
CGATGAGGAGGATGACAAGGCCATTGAGAACTACATTCTGTGAGCACACTGAGACCAC  
ATGGCACTGTCTGGGAACCTGTTCCATCGGTCCAAGAGAAGGTTCCAAGATCGTCAAA  
TGGGGTGGTGTTTGGACCACAGATCCAACGTTTACGGAGTCAAGGGCTTGAAGGTTG  
GTGACTTGTCCGTGTGCCAGACAATGTTGGTTGTAACACCTACACCACCGCTCTTTTG  
ATCGGTGAAAAGACTGCCACTTTGGTTGGAGAAATTTAGGATACCTGGTGGAGCCCT  
TAGACATGACTGTTCCCTCAGTTCAAGTTGGGCACTTACGAGAAGACCGGTCTTGCTAG  
ATTCTAA

*PpCTA*

---

ATGTCTCAACCACCTAAATcGGACAACATCAAATGGTGCTCCTGTCTCCGATGTATTTG  
CTACAGAGAGAGCCACCTTCGACAACGTAATCACGCTAACAATGCCCCCAAAGTTGG  
GCCTCTGCTGCTACAAGACTTTCAATTGATTGATTCTCTTGCCCATTTGACAGAGAAC  
GTATTCCAGAGAGAGTTGTGCATGCCAAAGGTGCGGGAGCTTTCGGTGAAGTTGAGGT  
GACTGACGACATATCTGACGTTTGTGCTGCCAAATTTGGATACTATTGGGAAGAAA  
ACCCGTATCTTCACTCGATTCTCCACCGTTGGAGGTGAGAAAGGTTCTGCCGACATG  
CCGTGACCCAAGAGGGTTTTCCACCAAGTTTTACACAGAGGAAGGTAAGTTGGACCTT  
GTGTACAACAACACTCCCATCTTCTTTATCAGAGATCCATCCAAGTTCCCACATTTT  
CCACACCCAAAAGAGGAATCCTGCTACTAACCTGAAGGACGCCAATATGTTCTGGGAT  
TACCTTGTTAAACAACCAAGAGTCCATTCATCAGGTGATGACTTGTCTCAGATCGTGG  
AACTCCTGCTTCTTTAGAAAAATGAACGGGTACTCTGGTCACTTACAAATGGTAC  
AACAAGAAAGGTGAGTGGGTTTACGTACAAGTTCACCTCAAGTCGGACCTGGGTGTCG  
TAAACTTCAACAATGAAGAGGCTGGAAAGCTTGTGGCGAGGATCCAGACTACCCAC  
CGGTGATCTTTTCAACGCCATTGAGAGAGGGGAGTATCCTTCATGGACTTGTACATTC  
AGACCATGACTCAAGAACAAGCTGCCAAGCAACCATTTTCCGTGTTTGAAGTACCAA  
GGTTTGGCCACACAAAGACTTCCCATTGAGGAGATTTGGTAAATTCATTTGAACGAA  
AACCCAAAGAACTACTTTGCCGAAGTTGAGCAAGCCGCTTCTCTCCATCTCATACTAT  
CCCTAGTATGCAGCCATCTGCTGATCCAGTCTTCAATCTCGACTGTTCTCTACCCAG  
ATACTACCGTCATAGATTGGGTGTTAACTATCAGCAGATTCTGTCAATTGTCCAGTG  
GCTCCTGTTTTTACCCTCAGATGCGTGTGGTTCCATGACTGTCAATGGCAAGCTTGG  
GTCTACTCCAACTACAAGTCTTCTTTCTGTCCATTCTCTACAGAGGCACAGATCCAGA  
CCAATTCACACACACCAGAAGAAGTTTTGGCTGCTCACTGAGAAATTCCTACTGGGG  
AGGTATCCTTGACAGTAAGAGCTACGATTTTGAACAGCCAAGAGCGCTTTGGAAAGTA  
TTCGGCAAACTCCTGGTCAGCAACGTAACCTTCTGCCACAACGTTGCCGTTACGTTGC  
GGCTGCCAACCATGAAATTCAAGACAGGGTTTTTGAATACTTCTCCAAGGTTTACCCTG  
AAATTGGTGACCAGATTTCGTAAGAAGTATTGCAGCTATCTCCAAGAGGTGACTCTGC  
AGCAAGATTGTAG

*PpDAK*

---

ATGTCTAGTAAACATTGGGATTACAAGAAAGATCTGGTACTCAGCCATCTGGCTGGAT  
TATGTCAGTCCAACCCCATGTAAGGCTAATTGAGTCCGAAAGAGTCGTCATCTCCGC  
CGAGAACCAGGAGGACAAGATTACCTTGATCTCTGGTGGAGGTTTCAGGACACGAGCCT  
CTACATGCTGGCTTTGTACCAAGGACGGTCTTTTGGATGCCGCTGTGGCCGGGTTT  
CTTTGCCTCGCCATCTACTAAACAGATATTTAGCGCAATCAAAGCCAAACCTTCGAAG  
AAGGAACTTTGATCATCGTCAAGAACTATACAGGAGACATTCTTCACTTCGGTCTTGC  
CGCGAAAAGGCCAAGGCTCAACGCAGAACTGCTGATTTTCAGGACGA  
TGCTCTGTTGGTAAAGCCAAAGAATGGCCTGGTAGGGCGTAGAGGTTTGGCTGAACT  
TCTTTAGTGACAAGATTTTGGGTGCCAAAGCTTATTTACAAAAGGACAACCTGGAAT  
TGCATCAGCTGGTCACTTTCCGGTGAAGGTCGTTGCCAACCTGGTTACAATTGGTGTCT  
TCCTTGGACCATGTCACCATTCAGCCAGAGCAAACAACAGGAGGAAGATGATTGAG  
ATGACGAGCAGCGCTACGAAGTGCTAAAGCAGATGAATTTGAAATCGGAATGGGTA  
TTCACAACGAACCAGGTATCAAGAAGTCGTCGCCAATTCACAGTAGACGAATTGGT  
GGCTGAGCTACTGGAGTACCTTCTTTCGACTACCGATAAGGACCGAAATTCAGTCCAA  
TTTGACAAGAATGATGAAGTTGTGCTACTGATCAATAACTTGGGAGGAACCTCAGTGT  
TGGAATTGTACGCTATTCAGAACATTGTTGTGACCAACTGGCCTCCAAATATTCCATT  
AAACCAGTCCGATTTTCACTGGCACTTTACCACATCACTGGATGGGCCCCGGTTTTTC  
TATCACTTTATTGAATGCTACCAAGACAGGAGATAAAGATATCCTAAAGTTTTTAGAC  
CACAAAGACTAGTGCCCCTGGCTGGAACCTCAACATATCAGACTGGTCTGGCAGGGTTG  
ACAATTTTATTGTGGCTGCCCCAGAAATAGACGAAGGAGACAGTTCATCTAAGGTATC  
AAGAGCCAAAGATCACATTTGTATGACACTGTTGCAGGAGATGGTATTGGTGAAC  
GTTGGCGAATGGTTCCAATGCCATTTTAAAGGCTCTGGCTGAAGGAAAGCTTGATCTC  
AAAGACGGTGTAAATCACTGGTGCAAAATACAGACATCGTGGAAACTGCCATGGGTG  
GAACATCTGGAGGTCTGTACTCCATTTTTCATCAGCGCTTTAGCAAAGTCTTTGAAAGAG

---

---

AAGGAACTTCCGAGGGTGCCTACACACTGACCCTTGAAACGATCTCTGGATCCTTAC  
AGGCAGCACTTCAGTCTCTATTCAAATACACAAGAGCACGTACTGGAGACAGAACTCT  
TATTGACGCTTTGGAGCCATTGTAAAGGAATTCGCCAAGTCTAAGGATCTGAAACTT  
GCAACAAAAGCTGCCCATGATGGTGCTGAAGCCACAAGAAAGCTCGAAGCCAAGTTT  
GGAAGAGCATCTTATGTTGCCGAAGAAGAGTTCAAACAATTCGAAAGTGAAGGTGGA  
CTACCTGATCCTGGTGCTATTGGTCTTGCCGCTTTGATTTACAGGAATTACTGATGCATA  
CTTCAAATCTGAAACCAAGTTGTAG

*PpDAS2*

ATGGTTGACAACACTATCTATGCTATTGTTGGTGATGCTTGTGTTGCAAGAGGGACCTGC  
TTTGGAAATCGATTTCCCTTAGCTGGTCACTTGGCCTTGGACAACCTTATTGTGATCTACG  
ACAACAACCAGGTTTGTGTGATGGTTCCGTCGATGTTAACAACACCGAAGACATTTCT  
GCTAAGTTTAGAGCTCAGAACTGGAATGTCATTGAAGTCGAGAATGGTTCTAGAGATG  
TTGCTACCCTTGTCAAGGCCATCGAATGGGCCAAGGCTGAGAATGAGAGACCAACTCT  
GATCAACGTTAGAACTGAAATTGGACAGGATTCTGCCTTCGGTAACCACCACGCTGCT  
CACGGTTCTGCTCTTGGTGAGGAAGGTATCCGGGAGTTGAAGGCCAAGTACGGTTTCG  
ATGTCGCTAGAAAGTTCTGGTCCACAGGAGGTCTATGATTTCTTTGCTGAAAAACCA  
GCCGAGGGTGATCAACTAGTTGCTAACTGGAAGAAACTTTTGGATGAGTACGTTAAGA  
ACTATCCTCAAGAAGGTGAGGAATTAAGGCCCGTATTAGAGGTGAACTTCCAAAGAA  
CTGGAAGAGTTTCATTCCACAGGACAAAACAACCGAGCCAAGTCTACCAGAACCTCT  
GCTAGAGAAATTGTTAGATCTCTGGGACAAAACCTTCTCAGGTTATTGCTGGTTCTGG  
TGATGTCGCTGCCATTCTTTTGAAGTGGGAGGAGTTAAGTACTTCTTCAACCTTA  
AGTTACAAACTTCTGTGGATTGGGTGGTACTACTCTGGTAGATATATTGAGTTTGGT  
ATCAGAGAACACTCTATGTGTGCTATTGCCAATGGTTTGGCTGCATAACAAGGGTA  
CTTTCTTGCCTATTACCTCAACTTTCTACATGTTCTACCTGTATGCAGCACCTGCCTTGC  
GTATGGCTGCACTTCAAGAGTTGAAAGCAATTCACATTGCTACACACGACTCCATCGG  
AGCTGGTGAAGATGGTCCAACGCACCAGCCTATTGCTTTGCTTTCATTATTACAGAGCTA  
TGCCCAACTTCTACTACATTAGACCAGCCGATGCTACCGAGGTTGCAGCTCTGTTTGAA  
GTAGCTGTTGAGCTCGAGCACTCCACCTTGTCTCTCTGTCAGACACGAGGTTGAGCA  
ATACCCAGGTAAGACTTCGGCTGAGGGAGCCAAAAGAGGTGTTACGTCGTTGAAGA  
CTGTGAGGGTAAGCCAGACGTCCAATTAATTGGTGCTGGTTCCGAATTGGAGTTTGC  
GTCAAACTGCTCGTTTGCTAAGACAACAGAAGGGATGGAAGGTCAGAGTTCTGTCAT  
TCCCATGTCAGAGACTGTTTGACCAACAATCCCTGGCATAACAGACGTTCTGTCTTAGA  
AGAGGAGAGGTTCCAAGTGTGCTTGGTGGAGCCTATGTCGCATACGGATGGGAGAGAT  
ACGCCACTGCTGGTTACACCATGAACACCTTTGGTAAGTCTCTTCTGTTGAGGATGTC  
TACAAATACTTCGGATACACTCCTGAGAAGATTGGTGAGAAGGTTGCTGCATACGTCA  
ACTCTATTAAGGCTAGTCCCAAATCCTTTACGAATTCACCGATTTGAAGGGAAAACC  
AAAGCACGACAAACTATAA

*FLS*

ATGGCTATGATTACCGGTGGTGAATTGGTTGTTAGAAGTTTATTGAAGGCTGGTGTGTA  
ACATTTGTTTGGTTTGCACGGTATCCACATTGATACCATTTCCAAGCTTGTTTAGATCA  
CGATGTTCCAATTATTGATACTAGACACGAAGCCGCTGCTGGTACGCCGCTGAAGGT  
TACGCTAGAGCTGGTGCTAAGTTAGGTGTTGCATTAGTCACTGCTGGTGGTGGTTTTCAC  
TAACGCTGTTACTCCAATTGCTAATGCTCGTACTGATAGAAGTCCAGTTTGTCTTCTGA  
CAGTTCTGGTGCTTAAAGAGATGATGAAACTAACACTTTACAAGCTGGTATTGATCA  
AGTTGCTATGGCTGCTCCAATTAAGTGGGCCATAGAGTTATGGCAACTGAACAT  
ATTCCAAGATTGGTCATGCAAGCTATTAGAGCTGCCTTGTCTGCTCCAAGGGTCCAGT  
TTTGTGGATTTGCCATGGGATATCTGATGAACCAGATTGATGAAGATTCTGTTATCA  
TCCCTGATTTGGTTTTGTCCGCCATGGTGCTCATCCAGACCCAGCTGATTTGGATCAA  
GCCTTGGCACTATTAAGAAAGGCTGAAAAGACCAGTTATCGTTTTAGGTAGTGAAGCTT  
CAAGAAGTCTAGAAAGACCGCTTTGTCAGCTTTGCTGCTGCCACTGGTGTCCCTGTT  
TTCGCTGACTATGAAGTTTATCTATGTTATCTGGTTTGCCTGATGCTATGAGAGGTGG  
TTTAGTTCAAAACCTTTACTCTTTTCGTAAGGCCGATGCCGCTCCAGATCTAGTTTTGA  
TGTTGGGTGCTAGATTCCGTTTGAACACCGGTCATGGTTCTGGTCAATTAATTCCACAT  
TCTGCTCAAGTTATTCAAGTTGATCCAGACGCTTGTGAATTGGGTAGATTGCAAGGCAT  
TGCTTTAGGTATCGTTGCTGATGTTGGTGGTACCATAGAAGCTTTAGCTCAAGCAACCG  
CTCAAGACGCTGCTTGGCCAGATAGAGGTGACTGGTGTGCTAAAGTTACTGACTTAGC  
TCAAGAAAGATACGCTTCTATTGCTGCTAAGTCATCTTCTGAACATGCTTTGCATCCTT  
TCCACGCTTCCCAAGTTATTGCTAAACAGTTGATGCTGGTGTACTGTTGTTGCCGAT  
GGTGGTTTACTTACTTGTGGTTGTGCAAGATTATGTCTCGTGTAAAGCCTGGTGGTTT  
CTTGTGTCATGGTTACTTGAAGTTGATGGGTGTTGGTTTCCGTTACAGCTTTAGGTGCTC  
AAGTCGCCGACTTAGAAGCCGGTCTGCTACTATTTTGGTCACTGGTGACGCCTCTGTT  
GTTTACTCTATTGGTGAATTCGATACCTTGGTTAGAAAGCAATTACCATTGATTGTTAT  
TATCATGAACAATCAATCTTGGGGTTGGACTTTACATTTCCAACAATTAGCTGTCCGGTC  
CAAATAGAGTTACTGGTACTAGATTAGAAAACGGTTCCTATCATGGTGTGCTGCTGTC  
CTTCGTTGCTGATGGTTACCATGTTGATTCTGTTGAATCCTTTTACGCTTGCTTATGCTCA  
AGCTTTGGCTCATAACAGACCTGCTTGTATTAATGTTGCTGTCGCTTGGACCCAAATTC  
CACCAGAAGAATTGATTTTATTGGTATGGACCCATTTGCTGGTTCTACTGAAAACCTG  
TACTTCCAATCCGGTGTCTAA

---



1. A. Nanchen, T. Fuhrer and U. Sauer, *Methods Mol. Biol.*, 2007, **358**, 177-197.
2. J. Lian, M. Hamedirad, S. Hu and H. Zhao, *Nature communications*, 2017, **8**, 1688.
3. J. Lian, C. Schultz, M. Cao, M. Hamedirad and H. Zhao, *Nat. Commun.*, 2019, **10**, 5794.
4. M. Qi, B. Zhang, L. Jiang, S. Xu, C. Dong, Y. L. Du, Z. Zhou, L. Huang, Z. Xu and J. Lian, *Front. Bioeng. Biotechnol.*, 2020, **8**, 613771.
